# Supplementary material
Source: HighWire-hosted journal article supplement (https://bmjopen.bmj.com/content/12/1/e050843)
Supplement: inline-supplementary-material-11 [file inline-supplementary-material-11.pdf]

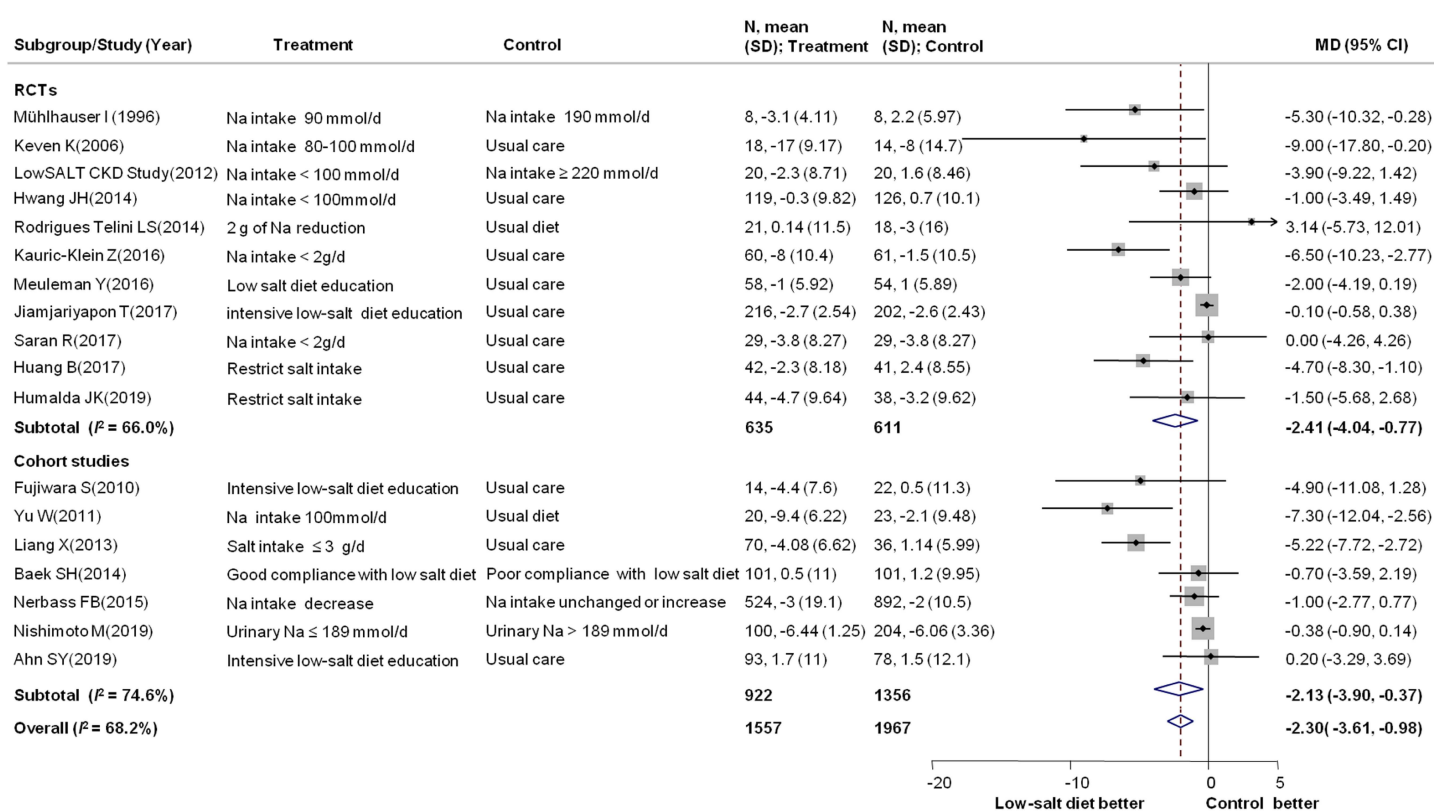

Supplementary file 11 Forest plot for DBP. CI, confidence interval; Cr, creatinine; MD, mean difference; Na, sodium; DBP, diastolic blood pressure; SD, standard deviation.
