# Supplementary material
Source: HighWire-hosted journal article supplement (https://bmjopen.bmj.com/content/12/1/e050843)
Supplement: inline-supplementary-material-13 [file inline-supplementary-material-13.pdf]

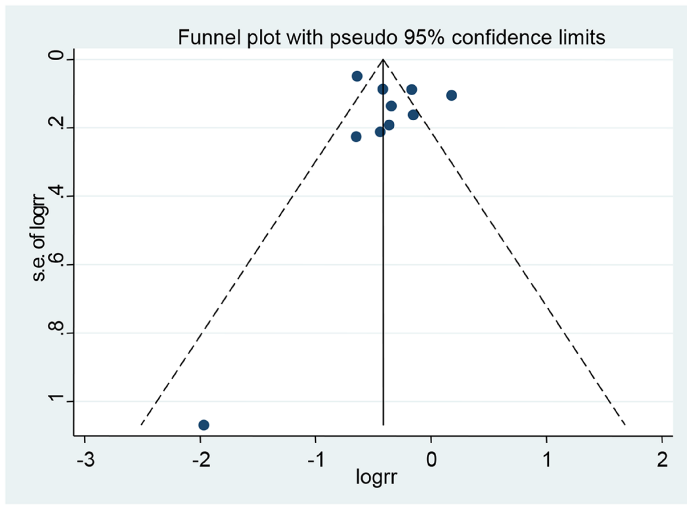

Funnel plot for publication bias on renal composite outcomes events.

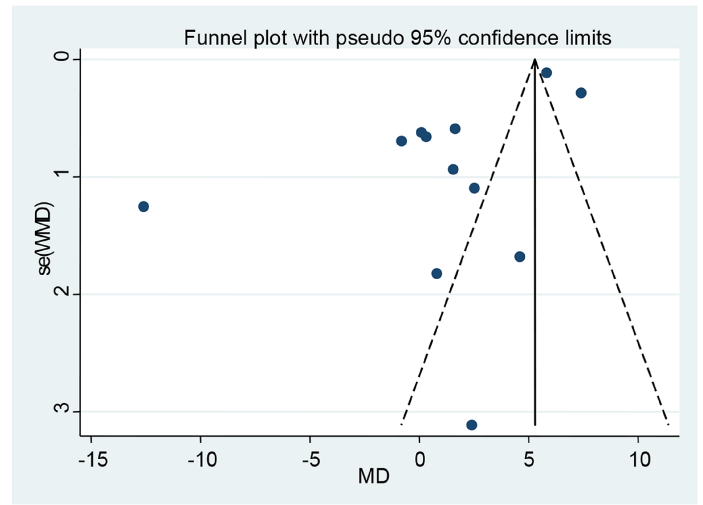

Funnel plot for publication bias on rate of change eGFR.

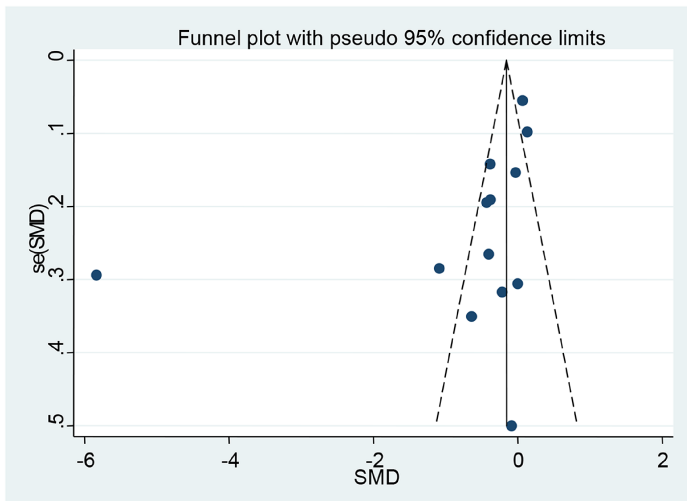

Funnel plot for publication bias on change in proteinuria or albuminuria.

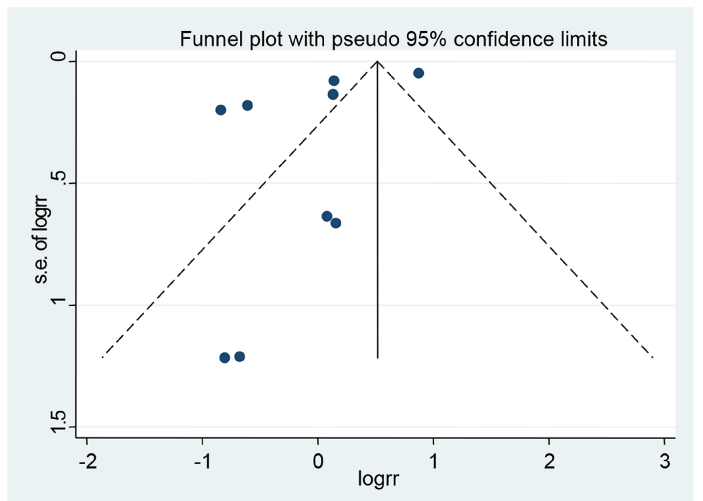

Funnel plot for publication bias on all-cause mortality events.

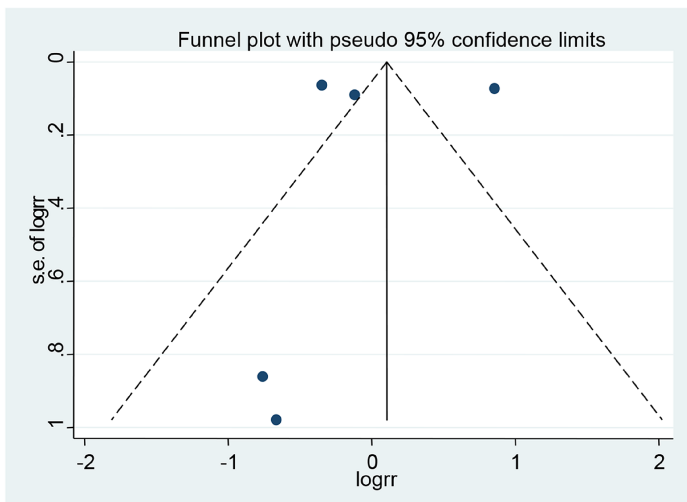

Funnel plot for publication bias on CV events.

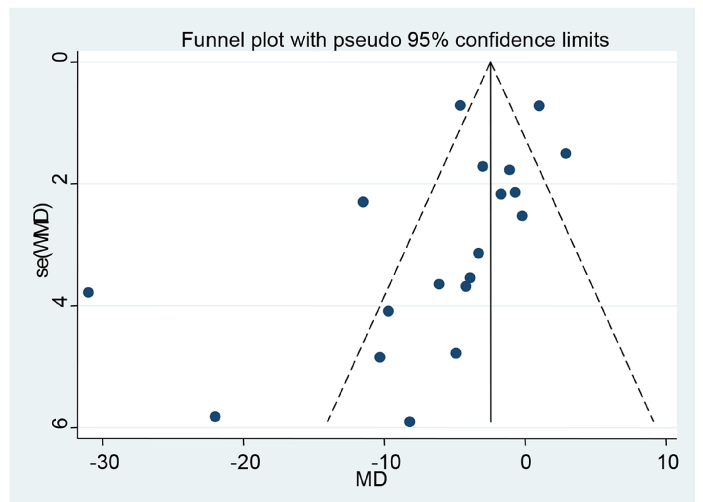

Funnel plot for publication bias SBP.

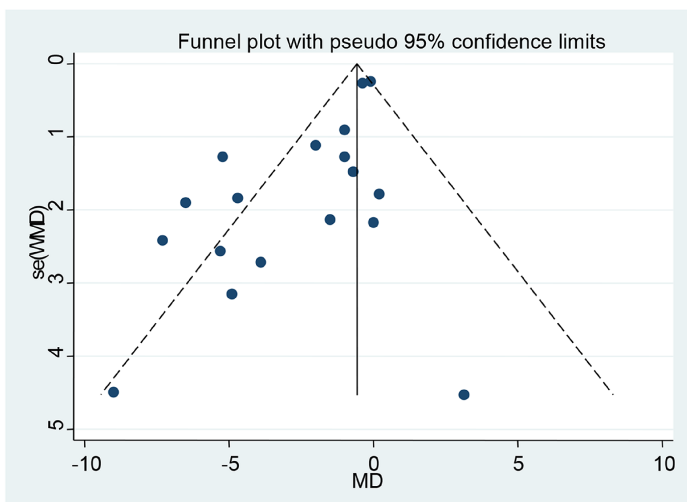

Funnel plot for publication bias on DBP.

**Supplementary file 13** Funnel plot for publication bias on outcomes. CV, cardiovascular; DBP, diastolic blood pressure; MD, mean difference; RR, relative risk; SMD, standard mean difference; SBP, systolic blood pressure.
